# Supplementary material for: Two main genetic clusters with high admixture between forest and cultivated chestnut (Castanea sativa Mill.) in France
Source: Springer Nature journal article supplement (doi:10.1007/s13595-020-00982-w), 2020-07-28

TWO MAIN GENETIC CLUSTERS WITH HIGH ADMIXTURE BETWEEN FOREST AND CULTIVATED  
CHESTNUT (*CASTANEA SATIVA* MILL.) IN FRANCE

ESM\_4 TESTS FOR HARDY-WEINBERG EQUILIBRIUM (HWE) ON THE 18UNIK AND 10UNIK DATA  
SETS

In order to test the HWE per sampling region, we first separated the sampling regions with the function `seppop()` from package `adegenet`, focusing on the analytical  $p$  values by setting  $B = 0$ . We then created a matrix that only contains  $p$  values, with sampling regions in columns and loci in rows. From this matrix we created the figures below which are heatmap showing significant departure from HWE. Note, that all loci shown in pink are loci suspected of not being in HWE with  $p \leq 0.05$ .

ESM\_4A TESTS FOR HWE OVER ALL SAMPLING REGIONS (18UNIK)

| <b>Locus</b>    | <b>chi<sup>2</sup></b> | <b>Df</b> | <b>Pr(chi<sup>2</sup>&gt;)</b> | <b>Pr.exact</b> |
|-----------------|------------------------|-----------|--------------------------------|-----------------|
| <b>CsCAT14</b>  | 36.14                  | 10        | 0.000                          | 0               |
| <b>CsCAT2</b>   | 925.289                | 171       | 0.000                          | 0               |
| <b>EMCS15</b>   | 13.682                 | 6         | 0.033                          | 0.027           |
| <b>CsCAT16</b>  | 110.958                | 45        | 0.000                          | 0               |
| <b>CsCAT3</b>   | 375.864                | 465       | 0.999                          | 0.022           |
| <b>QpZAG36</b>  | 28.894                 | 10        | 0.001                          | 0               |
| <b>CsCAT41B</b> | 717.913                | 55        | 0.000                          | 0               |
| <b>QpZAG110</b> | 47.17                  | 55        | 0.765                          | 0.176           |
| <b>QrZAG4</b>   | 0.554                  | 1         | 0.457                          | 0.597           |
| <b>QrZAG96</b>  | 72.068                 | 21        | 0.000                          | 0               |
| <b>CsCAT1</b>   | 125.739                | 55        | 0.000                          | 0.102           |
| <b>CsCAT15</b>  | 52.317                 | 45        | 0.211                          | 0.003           |
| <b>CsCAT6</b>   | 467.523                | 120       | 0.000                          | 0               |
| <b>CsCAT8</b>   | 393.228                | 36        | 0.000                          | 0               |
| <b>CsCAT17</b>  | 97.665                 | 45        | 0.000                          | 0               |
| <b>RIC</b>      | 3.585                  | 6         | 0.733                          | 0.653           |
| <b>OCI</b>      | 24.222                 | 10        | 0.007                          | 0.007           |
| <b>OAL</b>      | 59.518                 | 36        | 0.008                          | 0.011           |



ESM\_4C TESTS FOR HWE OVER ALL SAMPLING REGIONS (10UNIK)

| Locus    | chi^2  | df  | Pr(chi^2>) | Pr.exact |
|----------|--------|-----|------------|----------|
| CsCAT14  | 60.4   | 15  | 0.000      | 0.000    |
| CsCAT2   | 1716.4 | 190 | 0.000      | 0.000    |
| EMCS15   | 31.7   | 6   | 0.000      | 0.000    |
| EMCS2    | 25.1   | 3   | 0.000      | 0.000    |
| CsCAT16  | 183.4  | 45  | 0.000      | 0.000    |
| CsCAT3   | 544.1  | 528 | 0.305      | 0.003    |
| QpZAG36  | 47.4   | 10  | 0.000      | 0.000    |
| CsCAT41B | 2044.5 | 78  | 0.000      | 0.000    |
| QpZAG110 | 67.2   | 55  | 0.125      | 0.009    |
| QrZAG96  | 107.0  | 21  | 0.000      | 0.000    |

ESM\_4D HEATMAP OF ANALYTICAL P VALUES FROM HWE TESTS PER SAMPLING REGION (10UNIK)

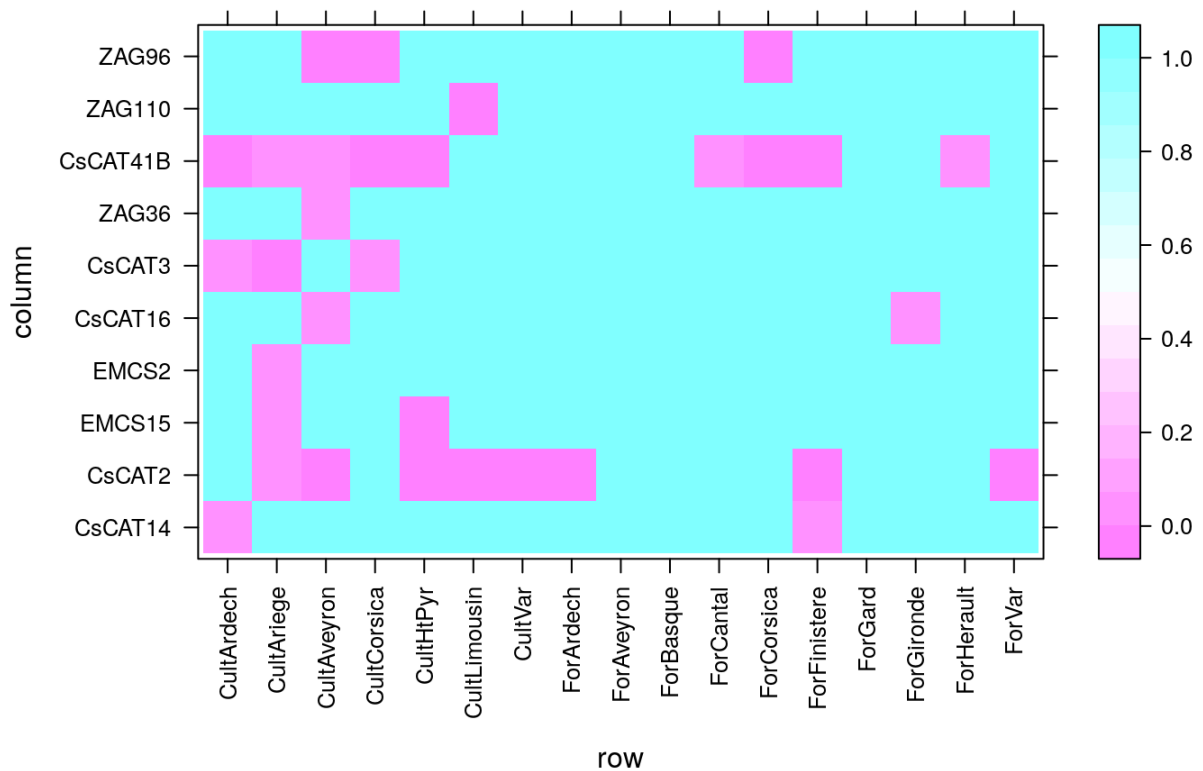

Supplement: MOESM4 [file 13595_2020_982_MOESM4_ESM.pdf]
