# Supplementary material for: Two main genetic clusters with high admixture between forest and cultivated chestnut (Castanea sativa Mill.) in France
Source: Springer Nature journal article supplement (doi:10.1007/s13595-020-00982-w), 2020-07-28

# TWO MAIN GENETIC CLUSTERS WITH HIGH ADMIXTURE BETWEEN FOREST AND CULTIVATED CHESTNUT (*CASTANEA SATIVA* MILL.) IN FRANCE

## ESM\_7 DETECTION OF GENETIC CLUSTERS

ESM\_7A 18UNIK DATA SET

BIC OF THE 18UNIK DATA SET

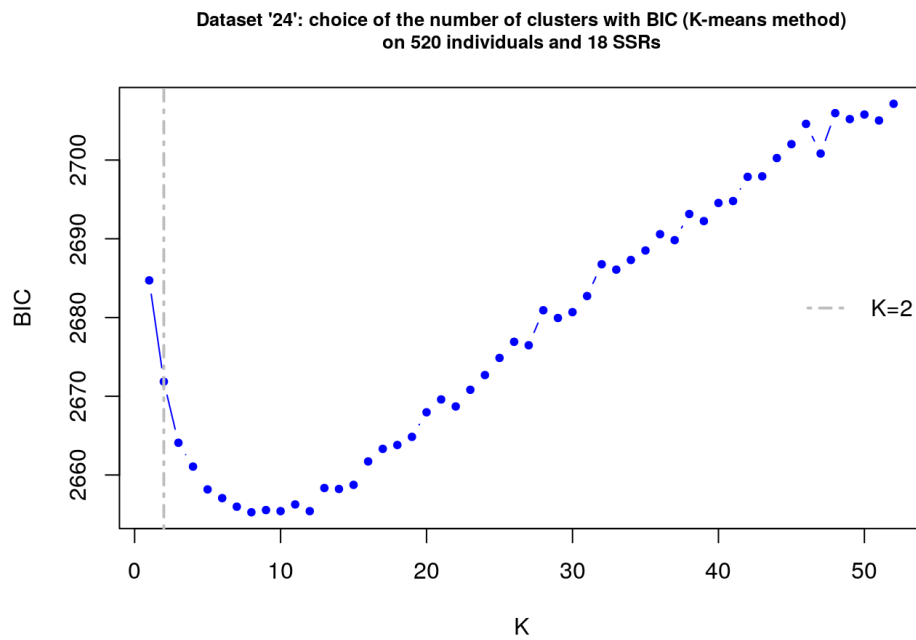

CROSS-ENTROPY CRITERION OF THE 18UNIK DATA SET

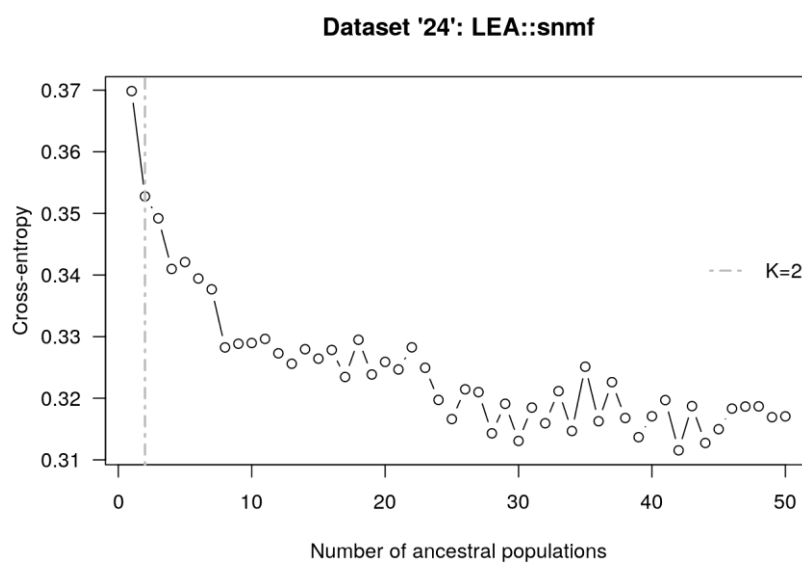

### DELTA K OF THE 18UNIK DATA SET

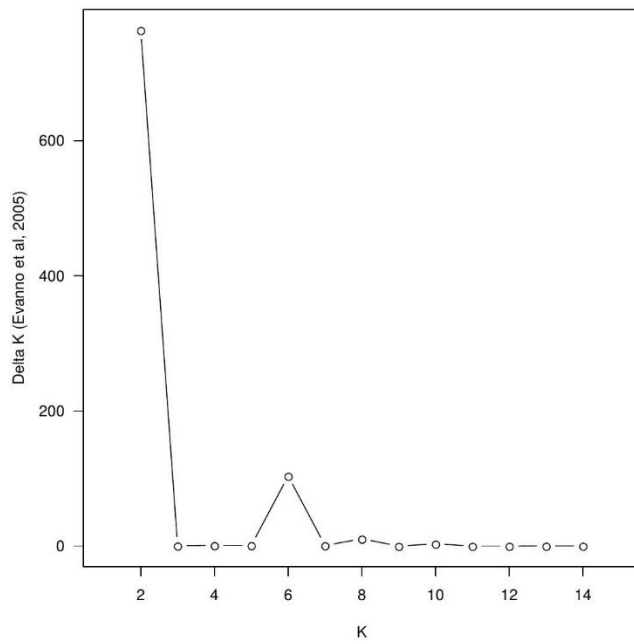

### ESM\_7B 10UNIK DATA SET

#### BIC OF THE 10UNIK DATA SET

Dataset '13': choice of the number of clusters with BIC (K-means method) on 1050 individuals and 10 SSRs

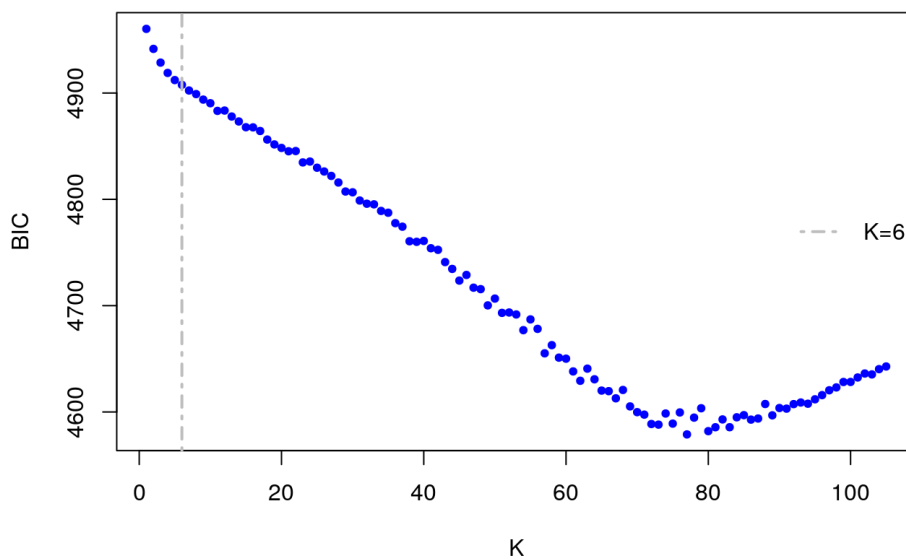

## CROSS-ENTROPY CRITERION OF THE *10UNIK* DATA SET

**Dataset '13': LEA::snmf**

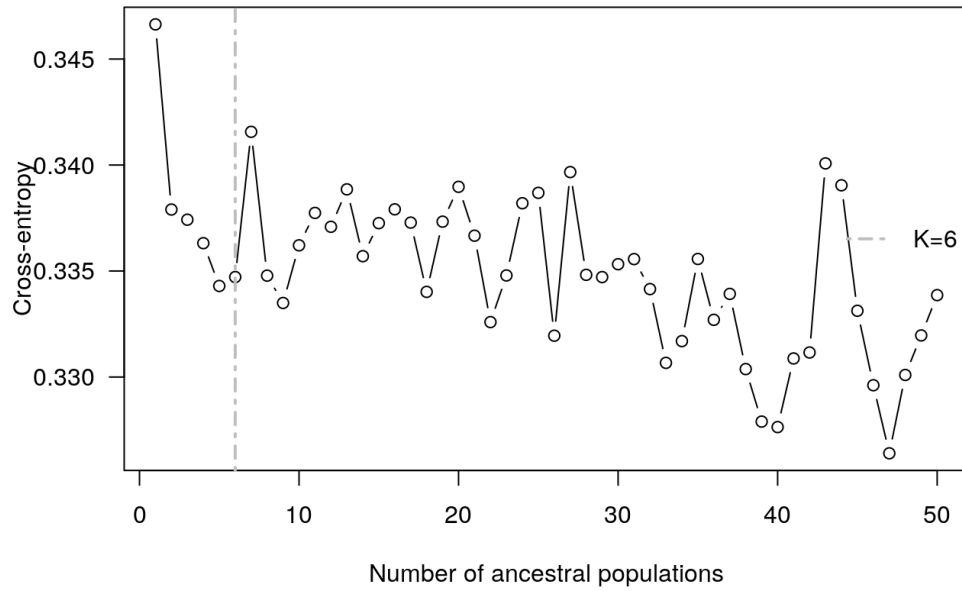

## DELTA K OF THE *10UNIK* DATA SET

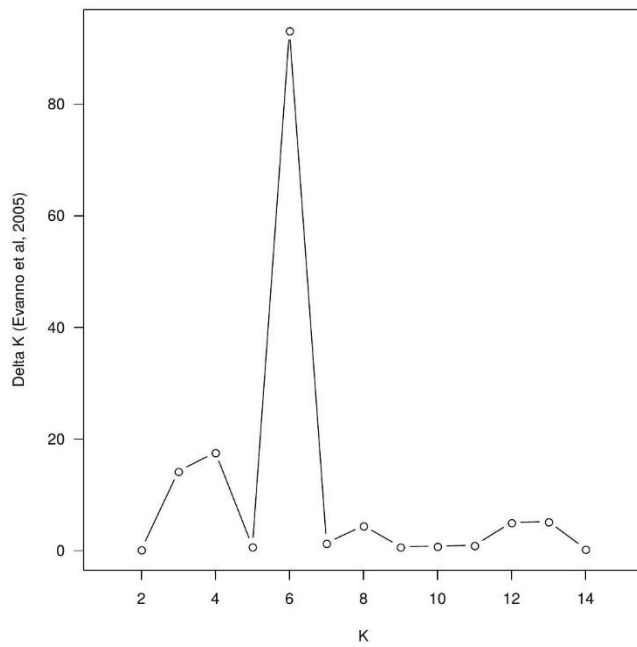

# ESM\_7C 18UNIK DATA SET WITH SPANISH SAMPLES

## BIC OF THE 18UNIK DATA SET WITH SPANISH SAMPLES

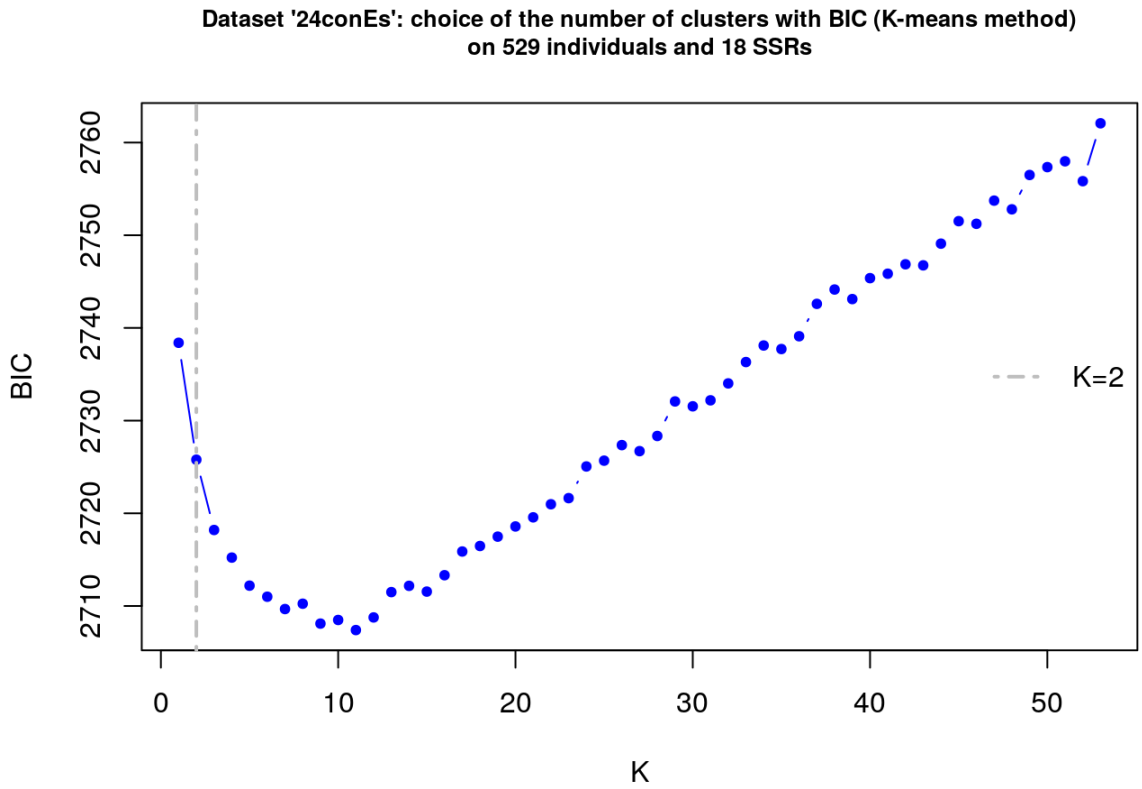

## CROSS-ENTROPY CRITERION OF THE 18UNIK DATA SET WITH SPANISH SAMPLES

### Dataset '24conEs': LEA::snmf

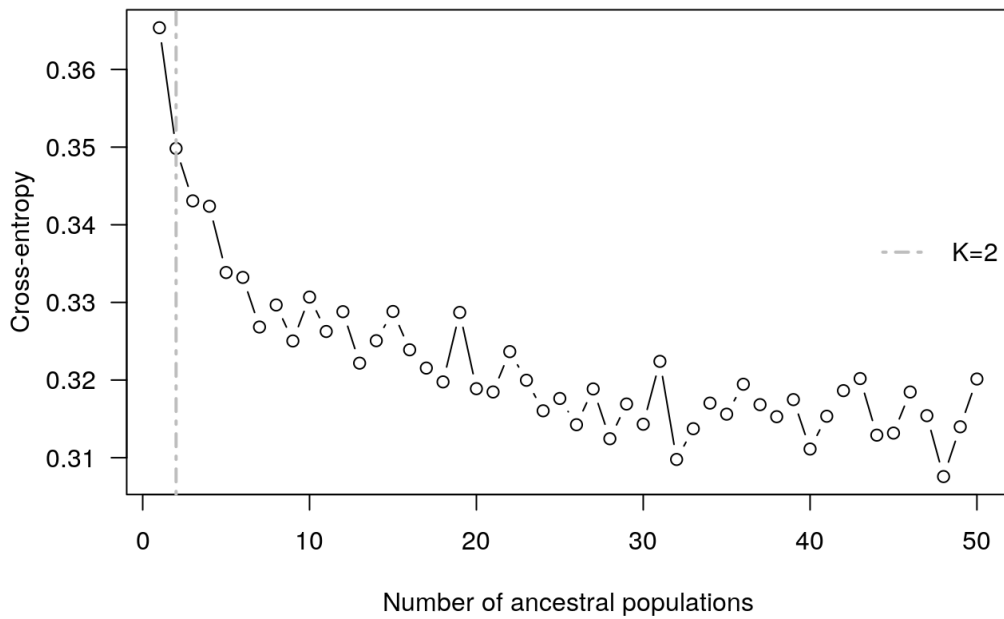

### DELTA K OF THE 18UNIK DATA SET WITH SPANISH SAMPLES

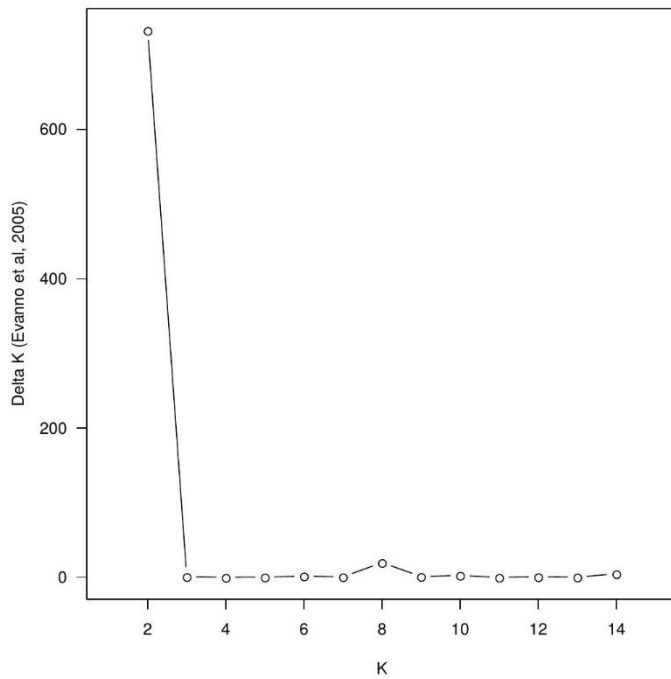

### ESM\_7D 10UNIK DATA SET WITH SPANISH SAMPLES

#### BIC OF OF THE 10UNIK DATA SET WITH SPANISH SAMPLES

Dataset '13conEs': choice of the number of clusters with BIC (K-means method) on 1060 individuals and 10 SSRs

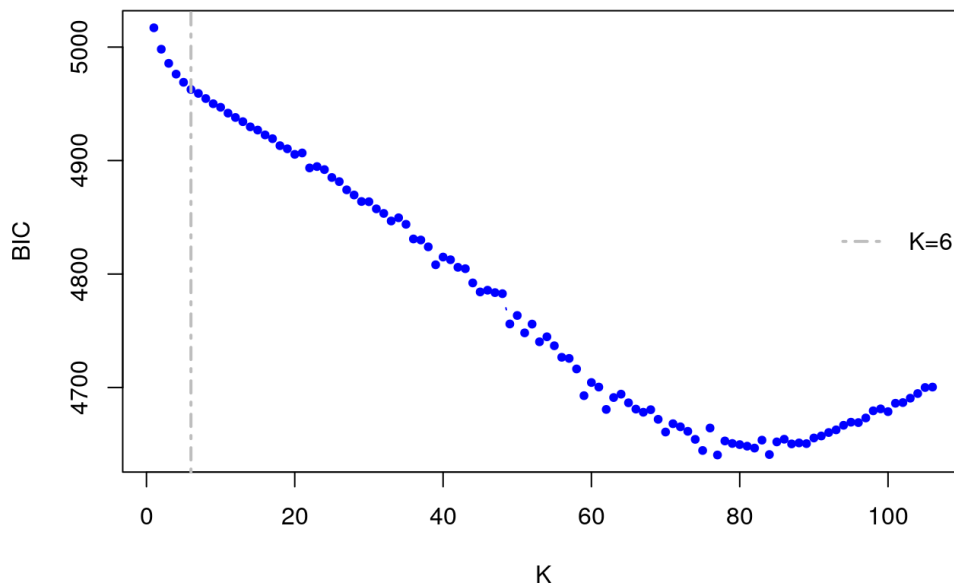

CROSS-ENTROPY CRITERION OF THE *10UNIK* DATA SET WITH SPANISH SAMPLES

Dataset '13conEs': LEA::snmf

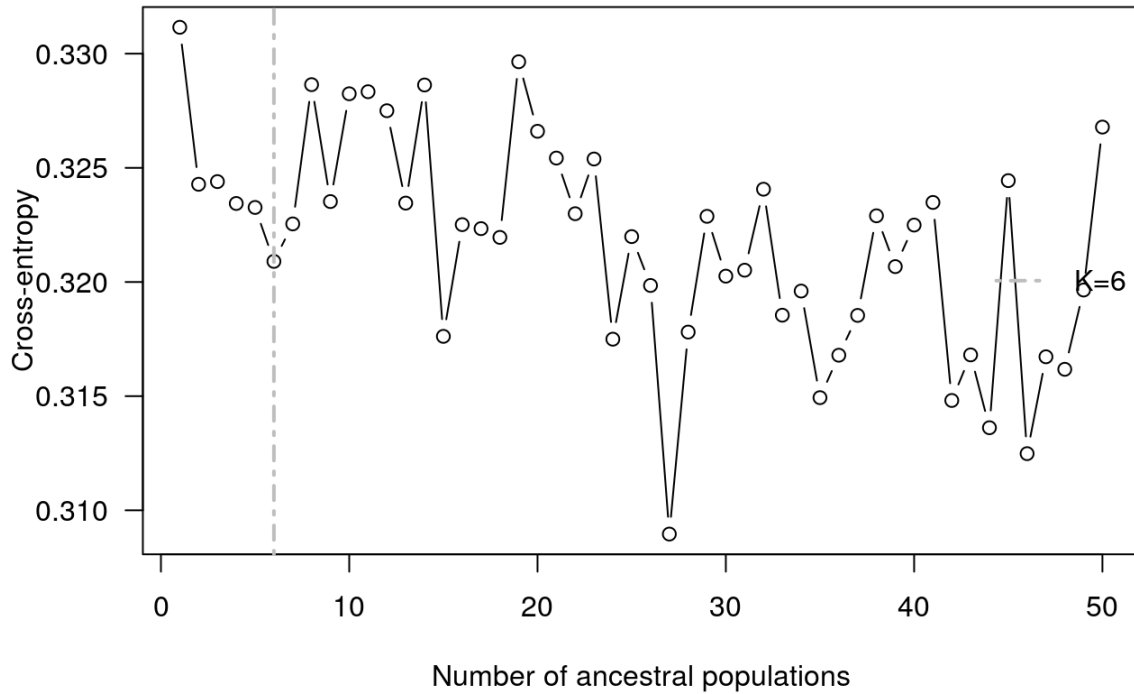

DELTA K OF THE *10UNIK* DATA SET WITH SPANISH SAMPLES

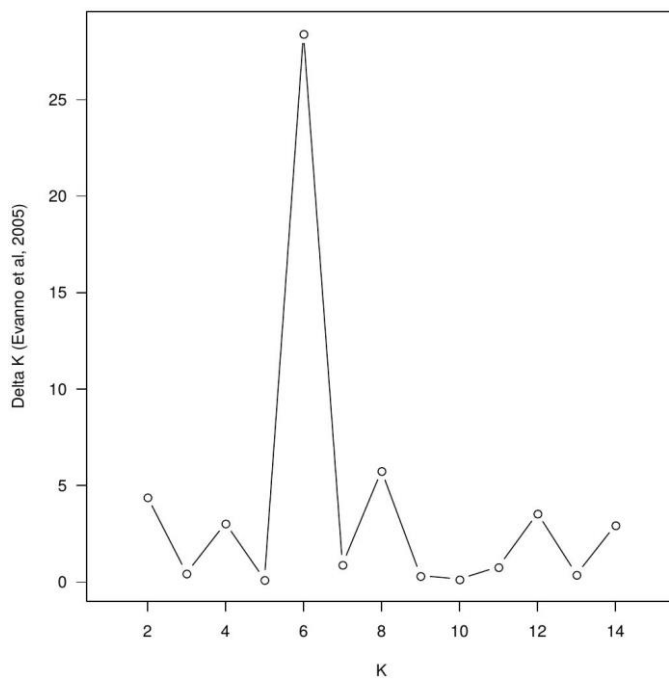

Supplement: MOESM7 [file 13595_2020_982_MOESM7_ESM.pdf]
