# Supplementary material for: Two main genetic clusters with high admixture between forest and cultivated chestnut (Castanea sativa Mill.) in France
Source: Springer Nature journal article supplement (doi:10.1007/s13595-020-00982-w), 2020-07-28

## TWO MAIN GENETIC CLUSTERS WITH HIGH ADMIXTURE BETWEEN FOREST AND CULTIVATED CHESTNUT (*CASTANEA SATIVA* MILL.) IN FRANCE

### ESM\_1 BOXPLOTS OF NULL ALLELES ACCORDING TO BROOKFIELD'S FORMULA

Any locus with a null allele frequency above a threshold of 10% was discarded: EMCs38, CIO and EMCs25 from the data set with 24 SSRs (first plot); EMCs38 from the data set with 13 SSRs (second plot).

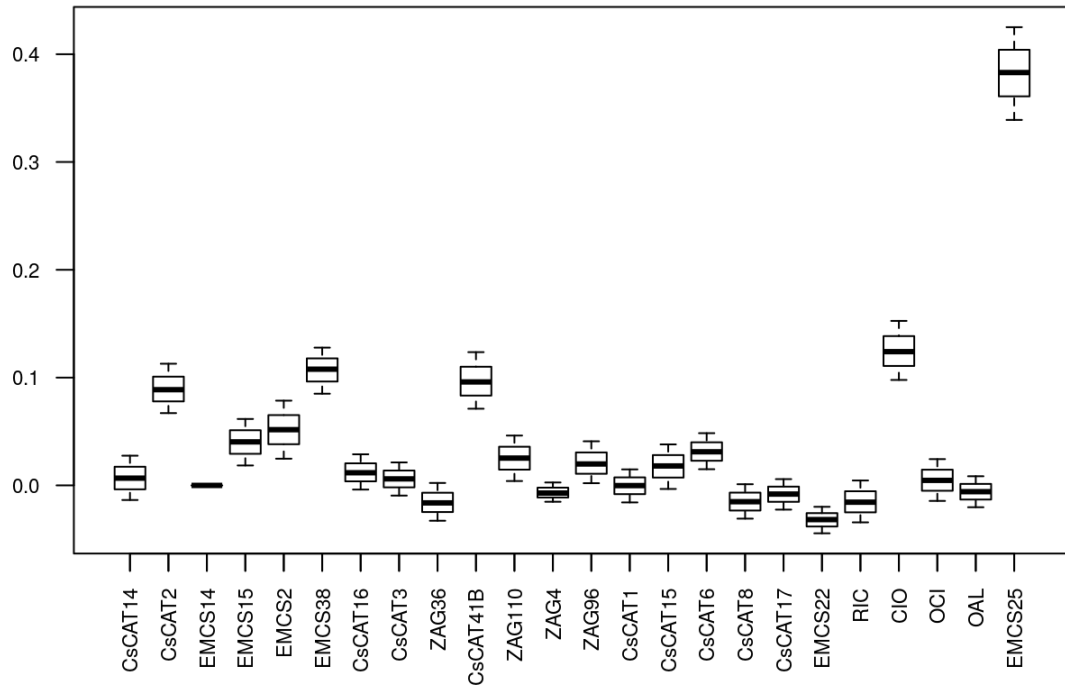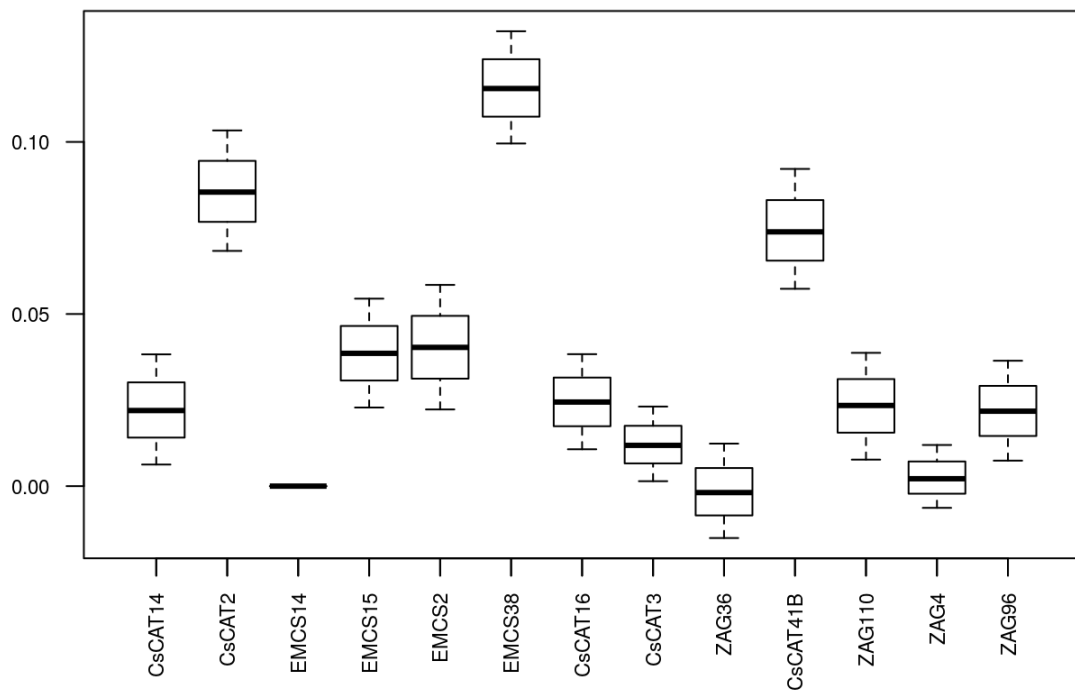

Supplement: MOESM1 [file 13595_2020_982_MOESM1_ESM.pdf]
