# Supplementary material for: Two main genetic clusters with high admixture between forest and cultivated chestnut (Castanea sativa Mill.) in France
Source: Springer Nature journal article supplement (doi:10.1007/s13595-020-00982-w), 2020-07-28

## TWO MAIN GENETIC CLUSTERS WITH HIGH ADMIXTURE BETWEEN FOREST AND CULTIVATED CHESTNUT (*CASTANEA SATIVA* MILL.) IN FRANCE

### ESM\_2 PLOTS OF GENOTYPE ACCUMULATION CURVES FOR THE 18UNIK AND 10UNIK DATA SETS

Genotype accumulation curves are useful for determining the minimum number of loci necessary to discriminate between individuals in a population. This was performed by randomly sampling loci without replacement and counting the number of multilocus genotypes (MLGs).

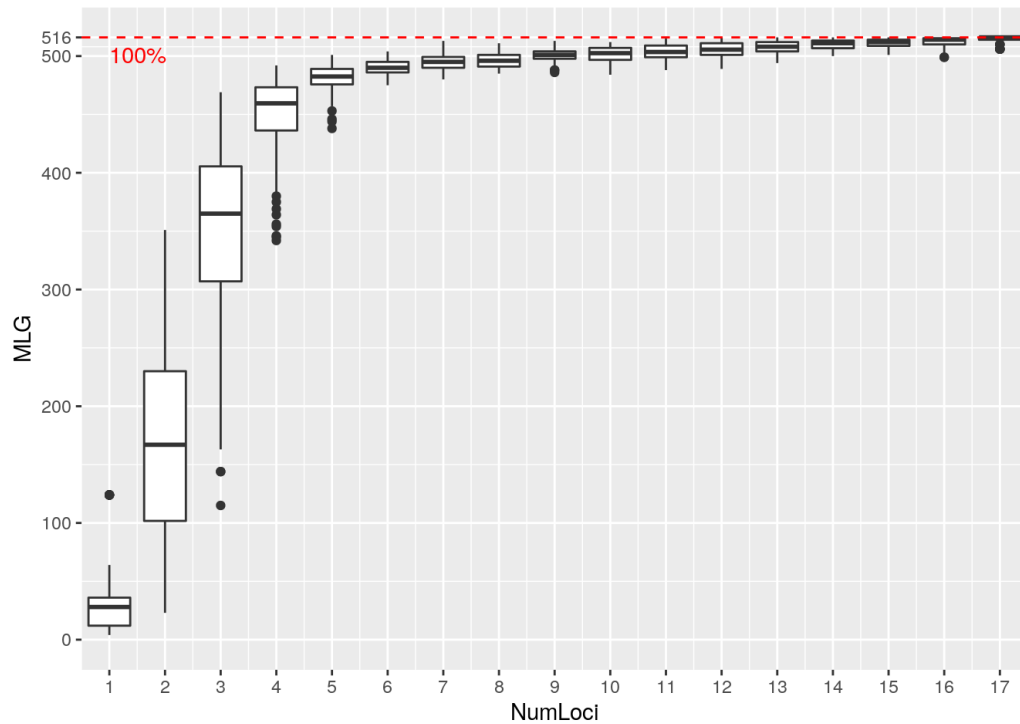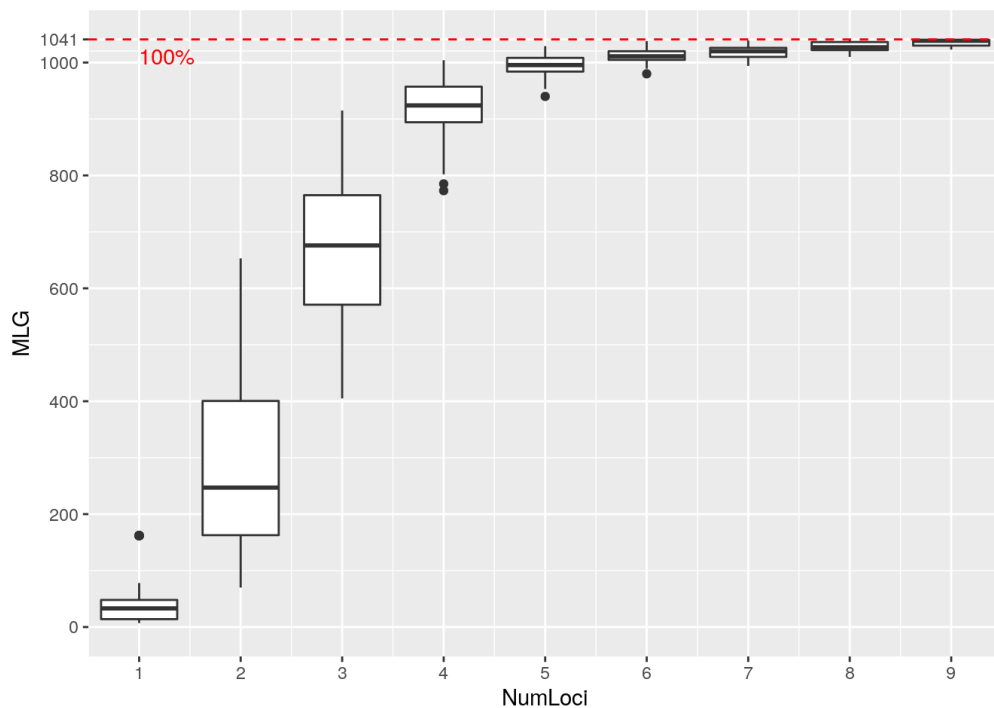

Supplement: MOESM2 [file 13595_2020_982_MOESM2_ESM.pdf]
