# Supplementary material for: Two main genetic clusters with high admixture between forest and cultivated chestnut (Castanea sativa Mill.) in France
Source: Springer Nature journal article supplement (doi:10.1007/s13595-020-00982-w), 2020-07-28
Supplement: MOESM3 [file 13595_2020_982_MOESM3_ESM.pdf]

TWO MAIN GENETIC CLUSTERS WITH HIGH ADMIXTURE BETWEEN FOREST AND CULTIVATED CHESTNUT (*CASTANEA SATIVA* MILL.) IN FRANCE

ESM\_3 GENETIC DIVERSITY PARAMETERS PER LOCUS FOR THE *UNIK* DATA SETS  
(WITHOUT MLGS)

ESM\_3A GENETIC DIVERSITY PARAMETERS PER LOCUS FOR THE *18UNIK* DATA SET

| Locus           | Range (pb) | Na   | Ho    | He    | Fst   | Fstp  | Fis    | Dest  |
|-----------------|------------|------|-------|-------|-------|-------|--------|-------|
| <b>CsCAT14</b>  | 134-161    | 5    | 0.65  | 0.69  | 0.083 | 0.088 | -0.002 | 0.17  |
| <b>CsCAT2</b>   | 194-234    | 19   | 0.69  | 0.85  | 0.152 | 0.161 | 0.152  | 0.476 |
| <b>EMCs15</b>   | 80-88      | 4    | 0.67  | 0.71  | 0.025 | 0.027 | -0.427 | 0.064 |
| <b>CsCAT16</b>  | 128-158    | 10   | 0.73  | 0.75  | 0.058 | 0.062 | -0.06  | 0.145 |
| <b>CsCAT3</b>   | 188-278    | 31   | 0.83  | 0.85  | 0.064 | 0.068 | -0.029 | 0.317 |
| <b>QpZAG36</b>  | 207-219    | 5    | 0.72  | 0.72  | 0.091 | 0.097 | -0.126 | 0.180 |
| <b>CsCAT41B</b> | 210-233    | 11   | 0.58  | 0.77  | 0.158 | 0.167 | -0.224 | 0.340 |
| <b>QpZAG110</b> | 204-234    | 11   | 0.69  | 0.71  | 0.064 | 0.068 | -0.03  | 0.136 |
| <b>QrZAG4</b>   | 109-113    | 2    | 0.18  | 0.17  | 0.159 | 0.167 | -0.275 | 0.043 |
| <b>QrZAG96</b>  | 144-165    | 7    | 0.67  | 0.73  | 0.123 | 0.13  | -0.008 | 0.296 |
| <b>CsCAT1</b>   | 177-223    | 11   | 0.7   | 0.7   | 0.092 | 0.097 | -0.131 | 0.196 |
| <b>CsCAT15</b>  | 123-156    | 10   | 0.72  | 0.74  | 0.061 | 0.065 | -0.107 | 0.145 |
| <b>CsCAT6</b>   | 157-200    | 16   | 0.79  | 0.86  | 0.125 | 0.132 | -0.106 | 0.469 |
| <b>CsCAT8</b>   | 187-212    | 9    | 0.81  | 0.82  | 0.046 | 0.049 | -0.072 | 0.169 |
| <b>CsCAT17</b>  | 131-160    | 10   | 0.81  | 0.82  | 0.091 | 0.096 | -0.103 | 0.288 |
| <b>RIC</b>      | 119-127    | 4    | 0.67  | 0.67  | 0.063 | 0.067 | -0.123 | 0.120 |
| <b>OCI</b>      | 144-158    | 5    | 0.69  | 0.7   | 0.114 | 0.120 | -0.061 | 0.231 |
| <b>OAL</b>      | 297-332    | 9    | 0.52  | 0.54  | 0.107 | 0.114 | -0.097 | 0.109 |
| <b>Mean</b>     | -          | 9.94 | 0.673 | 0.711 | 0.093 | 0.099 | -0.102 | 0.216 |

ESM\_3B GENETIC DIVERSITY PARAMETERS PER LOCUS FOR THE *10UNIK* DATA SET

| Locus           | Range(pb) | Na   | Ho    | He    | Fst   | Fstp  | Fis    | Dest  |
|-----------------|-----------|------|-------|-------|-------|-------|--------|-------|
| <b>CsCAT14</b>  | 134-161   | 6    | 0.62  | 0.67  | 0.084 | 0.088 | -0.038 | 0.163 |
| <b>CsCAT2</b>   | 194-240   | 20   | 0.7   | 0.84  | 0.14  | 0.147 | 0.139  | 0.476 |
| <b>EMCs15</b>   | 80-88     | 4    | 0.66  | 0.72  | 0.026 | 0.027 | -0.431 | 0.065 |
| <b>EMCs2</b>    | 158-163   | 3    | 0.6   | 0.66  | 0.145 | 0.153 | 0.006  | 0.225 |
| <b>CsCAT16</b>  | 128-158   | 10   | 0.72  | 0.77  | 0.080 | 0.085 | -0.008 | 0.19  |
| <b>CsCAT3</b>   | 188-278   | 33   | 0.82  | 0.85  | 0.057 | 0.061 | -0.009 | 0.282 |
| <b>QpZAG36</b>  | 207-219   | 5    | 0.68  | 0.7   | 0.08  | 0.084 | -0.115 | 0.161 |
| <b>CsCAT41B</b> | 210-237   | 13   | 0.61  | 0.74  | 0.137 | 0.144 | 0.169  | 0.316 |
| <b>QpZAG110</b> | 204-234   | 11   | 0.67  | 0.7   | 0.072 | 0.076 | -0.007 | 0.153 |
| <b>QrZAG96</b>  | 144-165   | 7    | 0.67  | 0.72  | 0.08  | 0.085 | -0.02  | 0.201 |
| <b>Mean</b>     | -         | 11,2 | 0.675 | 0.737 | 0.09  | 0.095 | -0.031 | 0.223 |
