# Supplementary material for: Two main genetic clusters with high admixture between forest and cultivated chestnut (Castanea sativa Mill.) in France
Source: Springer Nature journal article supplement (doi:10.1007/s13595-020-00982-w), 2020-07-28
Supplement: MOESM5 [file 13595_2020_982_MOESM5_ESM.pdf]

TWO MAIN GENETIC CLUSTERS WITH HIGH ADMIXTURE BETWEEN FOREST AND CULTIVATED  
CHESTNUT (*CASTANEA SATIVA* MILL.) IN FRANCE

ESM\_5 GENETIC DIVERSITY PARAMETERS PER CHESTNUT SAMPLING REGION  
GENOTYPED AT 10 SSRs WITHOUT MLGS (10UNIK DATA SET)

N: number of unique individuals genotyped per sampling region; Na: number of alleles; Ne: mean number of effective alleles; Ho: observed heterozygosity; He: expected heterozygosity; H: Shannon-Weiner diversity index; Ia: index of association; rbarD: standardized index of association; Fis: inbreeding coefficient, with 95% confidence interval (CI). Stars indicate significant *p* values at the 0.001 threshold. The “Total” row contains the sum for N, the total for Na and H, and the mean for the other indices. In bold are extrema (for Fis, CI excluding 0).

| Sampling Regions    | N    | Na  | Ne   | Ho    | He    | H    | Ia     | rbarD  | Fis                     |
|---------------------|------|-----|------|-------|-------|------|--------|--------|-------------------------|
| <b>CultArdech</b>   | 47   | 63  | 3.11 | 0.696 | 0.671 | 3.85 | 0.495* | 0.055* | -0.080 [-0.191;0.032]   |
| <b>CultAriege</b>   | 64   | 68  | 3.37 | 0.627 | 0.698 | 4.16 | 0.274* | 0.031* | 0.055 [-0.055;0.148]    |
| <b>CultAveyron</b>  | 70   | 67  | 3.17 | 0.7   | 0.68  | 4.25 | 0.397* | 0.044* | -0.061 [-0.163;0.016]   |
| <b>CultCorsica</b>  | 38   | 62  | 3.41 | 0.684 | 0.697 | 3.64 | 0.285  | 0.032  | -0.013 [-0.136;0.116]   |
| <b>CultHtPyr</b>    | 42   | 62  | 3.14 | 0.618 | 0.673 | 3.74 | 0.445* | 0.05*  | -0.041 [-0.064;0.175]   |
| <b>CultLimousin</b> | 59   | 65  | 3.30 | 0.725 | 0.691 | 4.08 | 0.535* | 0.06*  | -0.067 [-0.171;0.012]   |
| <b>CultVar</b>      | 13   | 39  | 2.22 | 0.598 | 0.529 | 2.56 | 2.851* | 0.333* | -0.137 [-0.302;0.069]   |
| <b>ForArdech</b>    | 86   | 65  | 3.20 | 0.642 | 0.683 | 4.45 | 0.217* | 0.024* | 0.015 [-0.086;0.103]    |
| <b>ForAveyron</b>   | 140  | 58  | 2.75 | 0.633 | 0.635 | 4.94 | 0.237* | 0.026* | -0.034 [-0.136;0.024]   |
| <b>ForBasque</b>    | 24   | 44  | 2.42 | 0.614 | 0.575 | 3.18 | 0.415* | 0.046* | -0.072 [-0.174;0.005]   |
| <b>ForCantal</b>    | 22   | 47  | 2.54 | 0.636 | 0.593 | 3.09 | 0.272  | 0.030  | -0.089 [-0.186 ;0.027]  |
| <b>ForCorsica</b>   | 116  | 69  | 3.45 | 0.680 | 0.707 | 4.75 | 0.185* | 0.021* | -0.005 [-0.112 ;0.111]  |
| <b>ForFinistere</b> | 248  | 87  | 3.68 | 0.719 | 0.727 | 5.51 | 0.083* | 0.009* | -0.034 [-0.107;0.033]   |
| <b>ForGard</b>      | 30   | 56  | 2.90 | 0.740 | 0.645 | 3.40 | 0.251  | 0.028  | -0.161 [-0.260 ;-0.079] |
| <b>ForGironde</b>   | 5    | 41  | 3.60 | 0.580 | 0.650 | 1.61 | 1.043  | 0.124  | 0.205 [-0.022;0.386]    |
| <b>ForHerault</b>   | 16   | 49  | 3.20 | 0.719 | 0.666 | 2.77 | 0.286  | 0.032  | -0.081 [-0.193 ;0.141]  |
| <b>ForVar</b>       | 30   | 47  | 2.40 | 0.587 | 0.574 | 3.40 | 0.189  | 0.022  | -0.07 [-0.228;0.190]    |
| <b>Total</b>        | 1050 | 112 | 3.81 | 0.659 | 0.653 | 6.94 | 0.168* | 0.019* | 0.035                   |
