# Supplementary material for: Two main genetic clusters with high admixture between forest and cultivated chestnut (Castanea sativa Mill.) in France
Source: Springer Nature journal article supplement (doi:10.1007/s13595-020-00982-w), 2020-07-28
Supplement: MOESM6 [file 13595_2020_982_MOESM6_ESM.pdf]

TWO MAIN GENETIC CLUSTERS WITH HIGH ADMIXTURE BETWEEN FOREST AND CULTIVATED CHESTNUT (*CASTANEA SATIVA* MILL.) IN FRANCE

ESM\_6 HIERARCHICAL AMOVA AND F-STATISTICS

ESM\_6A HIERARCHICAL AMOVA AND F-STATISTICS FOR 17 FRENCH SAMPLING REGIONS GENOTYPED AT 10 SSRs WITHOUT MLGS (10UNIK DATA SET)

df: degrees of freedom, Alter: alternative hypothesis, 95% confidence intervals, \*\*\* p value  $\leq$  0.001.

| Source of variation                          | df   | Variance component | % of variation | p value  | Alter   | F statistic                  |
|----------------------------------------------|------|--------------------|----------------|----------|---------|------------------------------|
| Among chestnut type                          | 1    | -0.078             | -1.23          | 0.831    | greater | Fct -0.007 [-0.011 ; -0.002] |
| Among sampling regions within chestnut types | 15   | 0.799              | 12.58          | 0.001*** | greater | Fst 0.083 [0.07 ; 0.095]     |
| Within sampling regions                      | 1033 | 5.629              | 88.64          | 0.001*** | less    | Fis 0.015 [-0.009 ; 0.046]   |
| Total                                        | 1049 | 6.351              | 100.00         |          |         | Fit 0.09 [-0.06 ; 0.125]     |

ESM\_6B HIERARCHICAL AMOVA AND F-STATISTICS FOR SIX GENETIC CLUSTERS GENOTYPED AT 10 SSRs WITHOUT MLGS (10UNIK DATA SET)

df: degrees of freedom, Alter: alternative hypothesis, 95% confidence intervals, \*\*\* p value  $\leq$  0.001

| Source of variation | df   | Variance component | % of variation | p value  | Alter   | F statistic                |
|---------------------|------|--------------------|----------------|----------|---------|----------------------------|
| Among Clusters      | 5    | 0.729              | 11.3           | 0.001*** | greater | Fst 0.078 [0.064 ; 0.091]  |
| Within Clusters     | 1044 | 5.709              | 88.7           |          |         | Fis 0.022 [-0.005 ; 0.055] |
| Total               | 1049 | 6.438              | 100.00         |          |         | Fit 0.098 [0.063 ; 0.136]  |

ESM\_6C HIERARCHICAL AMOVA AND F-STATISTICS FOR SIX GENETIC CLUSTERS GENOTYPED OF STRONGLY ASSIGNED INDIVIDUALS ( $QL \geq 80\%$ ) AT 10 SSRs WITHOUT MLGS (10UNIK DATA SET)

df: degrees of freedom, Alter: alternative hypothesis, 95% confidence intervals, \*\*\* p value  $\leq$  0.001

| Source of variation | df  | Variance component | % of variation | p value  | Alter   | F statistic               |
|---------------------|-----|--------------------|----------------|----------|---------|---------------------------|
| Among Clusters      | 5   | 1.21               | 18.1           | 0.001*** | greater | Fst 0.125 [0.104 ; 0.144] |
| Within Clusters     | 558 | 5.46               | 81.9           |          |         | Fis 0.002 [-0.03 ; 0.042] |
| Total               | 563 | 6.67               | 100.00         |          |         | Fit 0.126 [0.085 ; 0.173] |
