# Supplementary material for: Two main genetic clusters with high admixture between forest and cultivated chestnut (Castanea sativa Mill.) in France
Source: Springer Nature journal article supplement (doi:10.1007/s13595-020-00982-w), 2020-07-28
Supplement: MOESM8 [file 13595_2020_982_MOESM8_ESM.pdf]

## TWO MAIN GENETIC CLUSTERS WITH HIGH ADMIXTURE BETWEEN FOREST AND CULTIVATED CHESTNUT (*CASTANEA SATIVA* MILL.) IN FRANCE

### ESM\_8

**ESM\_8A** CLASSIFICATION OF 529 EUROPEAN CHESTNUT GENOTYPES, IN RECONSTRUCTED PANMICTIC POPULATIONS (RPPS) WHEN K=2, BASED ON *18UNIK* DATA SET WITH SPANISH SAMPLES.

In green, French genotypes admixed (RPP1). In orange, genotypes from south-east of France (RPP2). Spanish genotypes are allocated in both RPPs.

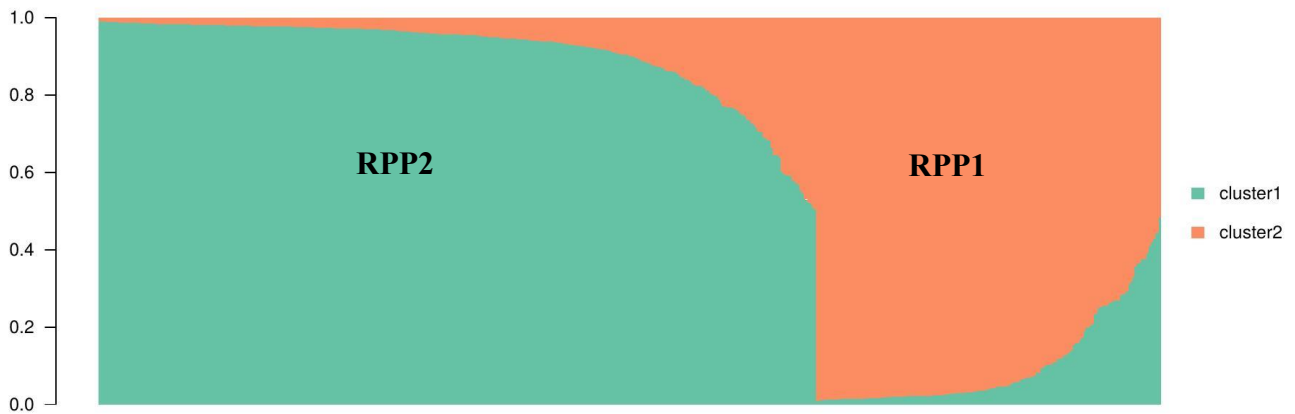

**Table of assignments of sampling regions in reconstructed panmictic populations (RPPs)**

| Sampling Region | RPP1<br>(qI≥50%) | RPP2<br>(qI≥50%) | Sum<br>RPP1+RPP2 | Admixed<br>(qI≤80%) |
|-----------------|------------------|------------------|------------------|---------------------|
| CultArdech      | 30               | 19               | 49               | 28                  |
| CultAriege      | 1                | 34               | 35               | 9                   |
| CultAveyron     |                  | 24               | 24               | 2                   |
| CultCorsica     | 32               | 6                | 38               | 16                  |
| CultHtPyr       |                  | 25               | 25               | 5                   |
| CultLimousin    |                  | 44               | 44               |                     |
| CultSpain       | 6                | 3                | 9                | 8                   |
| CultVar         | 4                |                  | 4                |                     |
| ForAveyron      |                  | 29               | 29               | 1                   |
| ForBasque       |                  | 1                | 1                |                     |
| ForCantal       |                  | 22               | 22               | 1                   |
| ForCorsica      | 70               | 1                | 71               | 8                   |
| ForFinistere    | 1                | 96               | 97               | 4                   |
| ForGard         | 1                | 29               | 30               |                     |
| ForGironde      |                  | 5                | 5                | 3                   |
| ForHerault      | 4                | 12               | 16               | 11                  |
| ForVar          | 30               |                  | 30               |                     |
| Sum             | 179              | 350              | 529              | 96                  |

**Table of posterior probabilities of assignment of Spanish samples in reconstructed panmictic populations (RPPs)**

| Samples | Name              | Cluster1<br> RPP2 | Cluster 2 <br>RPP1 |
|---------|-------------------|-------------------|--------------------|
| ref002  | <b>Chamberga1</b> | 0.684             | 0.316              |
| ref003  | <b>Negral</b>     | 0.711             | 0.289              |
| ref004  | <b>Pais</b>       | <b>0.849</b>      | 0.151              |
| ref005  | <b>Paredes</b>    | 0.31              | 0.69               |
| ref006  | <b>Porteliña</b>  | 0.372             | 0.628              |
| ref007  | <b>Puga</b>       | 0.727             | 0.273              |
| ref008  | <b>Raigona1</b>   | 0.664             | 0.336              |
| ref009  | <b>Rapada</b>     | 0.601             | 0.399              |
| ref010  | <b>Serodia</b>    | 0.366             | 0.634              |

**Tables of pairwise Fst between RPPs using all individuals and strongly assigned individuals (q<sub>L</sub> ≥ 80%)**

| RPPs | RPP1                 |
|------|----------------------|
| RPP2 | 0.065 [0.049 ; 0.08] |

| RPPs (q <sub>L</sub> ≥ 80%) | RPP1                 |
|-----------------------------|----------------------|
| RPP2                        | 0.089 [0.069 ; 0.11] |

**ESM\_8B CLASSIFICATION OF 1050 EUROPEAN CHESTNUT GENOTYPES. IN RECONSTRUCTED PANMICTIC POPULATIONS (RPPS) WHEN K=2 AND K=6**

K=2

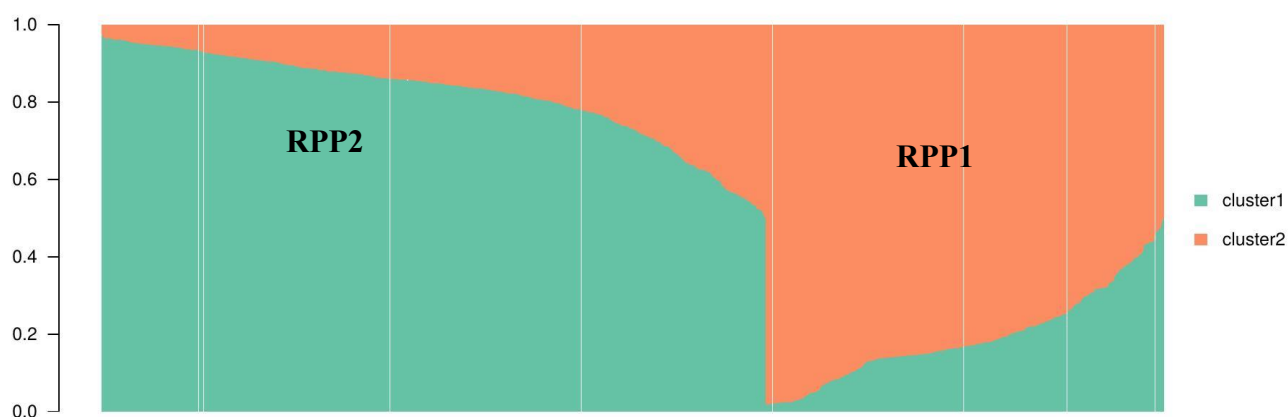

**Table of assignments of sampling regions in reconstructed panmictic populations (RPPs) when K=2**

| Sampling Regions | RPP2 (qI≥50%) | RPP1 (qI≥50%) | Sum RPP1+RPP2 | Admixed (qI≤80%) |
|------------------|---------------|---------------|---------------|------------------|
| CultArdech       | 6             | 41            | 47            | 20               |
| CultAriege       | 41            | 23            | 64            | 41               |
| CultAveyron      | 51            | 19            | 70            | 31               |
| CultCorsica      | 1             | 37            | 38            | 14               |
| CultHtPyr        | 29            | 13            | 42            | 24               |
| CultLimousin     | 59            |               | 59            | 5                |
| CultVar          | 1             | 12            | 13            | 1                |
| ForArdech        | 40            | 46            | 86            | 53               |
| ForAveyron       | 135           | 5             | 140           | 29               |
| ForBasque        | 22            | 2             | 24            | 13               |
| ForCantal        | 22            |               | 22            | 2                |
| ForCorsica       | 1             | 115           | 116           | 22               |
| ForFinistere     | 232           | 16            | 248           | 69               |
| ForGard          | 10            | 20            | 30            | 22               |
| ForGironde       | 1             | 4             | 5             | 4                |
| ForHerault       | 5             | 11            | 16            | 10               |
| ForVar           |               | 30            | 30            |                  |
| Sum              | 656           | 394           | 1050          | 360              |

**Tables of pairwise Fst between RPPs using all individuals and strongly assigned individuals (qI ≥ 80%)**

| RPPs | RPP1                  |
|------|-----------------------|
| RPP2 | 0.005 [0.029 ; 0.073] |

| RPPs (qI ≥ 80%) | RPP1                  |
|-----------------|-----------------------|
| RPP2            | 0.088 [0.054 ; 0.123] |

K=6

- In green. main genotypes are from Corsica (Cluster 1, RPP1b).
- In orange. main genotypes are from many sampling regions (Cluster 2, RPP2c)
- In blue. main genotypes are from Var and Ardech (Cluster 3, RPP1a).
- In pink. main genotypes are from West of France (Cluster 4, RPP2a).
- In clear green. genotypes from Aveyron (Cluster 5, RPP2b)
- In yellow. main genotypes are from Pyrenees (Cluster 6, RPP2d)

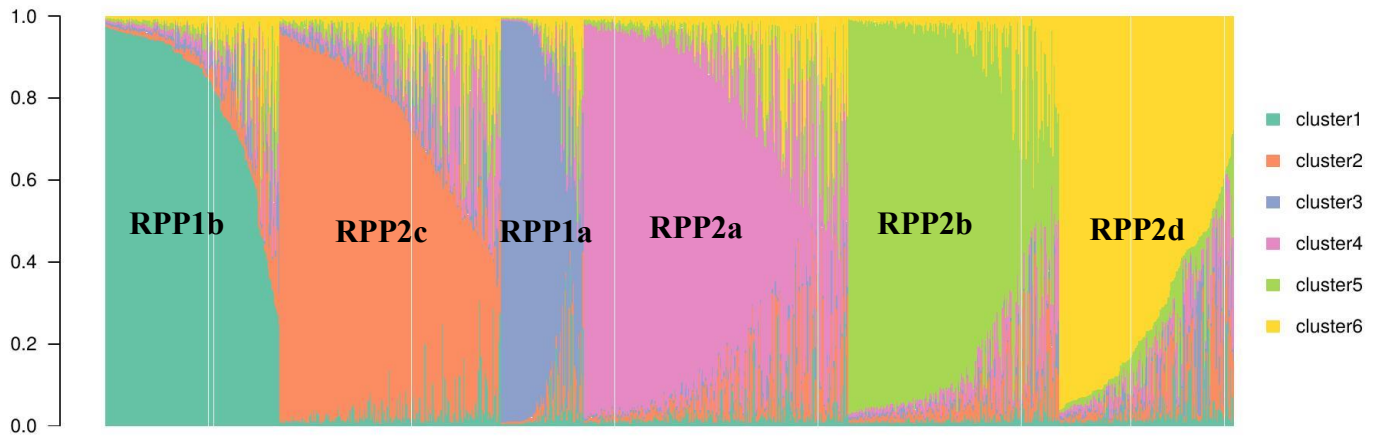

Table of assignement of sampling regions in reconstructed panmictic populations (RPPs) when K=6

| Sampling Regions | RPP1b   Cluster 1 | RPP2c   Cluster 2 | RPP1a   Cluster 3 | RPP2a   Cluster 4 | RPP2b   Cluster 5 | RPP2d   Cluster 6 | Sum  | Admixed (qI≤80%) |
|------------------|-------------------|-------------------|-------------------|-------------------|-------------------|-------------------|------|------------------|
| CultArdech       | 2                 | 15                | 22                | 1                 | 3                 | 4                 | 47   | 41               |
| CultAriege       | 3                 | 4                 | 2                 | 1                 | 6                 | 48                | 64   | 35               |
| CultAveyron      |                   | 19                | 5                 | 14                | 24                | 8                 | 70   | 49               |
| CultCorsica      | 34                | 1                 |                   |                   |                   | 3                 | 38   | 23               |
| CultHtPyr        |                   | 3                 |                   | 1                 | 1                 | 37                | 42   | 17               |
| CultLimousin     |                   | 3                 |                   | 43                | 4                 | 9                 | 59   | 27               |
| CultVar          |                   |                   | 12                | 1                 |                   |                   | 13   | 2                |
| ForArdech        | 2                 | 75                | 4                 | 4                 | 1                 |                   | 86   | 34               |
| ForAveyron       |                   | 11                |                   | 2                 | 123               | 4                 | 140  | 43               |
| ForBasque        | 2                 | 2                 |                   | 1                 |                   | 19                | 24   | 12               |
| ForCantal        |                   | 1                 |                   | 1                 | 17                | 3                 | 22   | 12               |
| ForCorsica       | 110               | 4                 |                   |                   | 1                 | 1                 | 116  | 26               |
| ForFinistere     | 6                 | 39                | 3                 | 173               | 13                | 14                | 248  | 138              |
| ForGard          |                   | 26                |                   | 1                 | 3                 |                   | 30   | 11               |
| ForGironde       | 2                 |                   |                   | 1                 |                   | 2                 | 5    | 3                |
| ForHerault       | 1                 | 2                 |                   | 2                 |                   | 11                | 16   | 9                |
| ForVar           |                   | 1                 | 29                |                   |                   |                   | 30   | 4                |
| Sum              | 162               | 206               | 77                | 246               | 196               | 163               | 1050 | 486              |

**Tables of pairwise Fst between RPPs using all individuals and strongly assigned individuals ( $q \geq 80\%$ )**

| <b>RPPs</b>             | <b>RPP2c   cluster2</b> | <b>RPP1a   cluster3</b> | <b>RPP2a   cluster4</b> | <b>RPP2b   cluster5</b> | <b>RPP2d   cluster6</b> |
|-------------------------|-------------------------|-------------------------|-------------------------|-------------------------|-------------------------|
| <b>RPP1b   cluster1</b> | 0.062<br>[0.045;0.081]  | 0.124<br>[0.071;0.193]  | 0.077<br>[0.049;0.114]  | 0.107<br>[0.082;0.13]   |                         |
| <b>RPP2c   cluster2</b> |                         | 0.103<br>[0.071;0.137]  | 0.059<br>[0.035;0.085]  | 0.075<br>[0.047;0.106]  | 0.053<br>[0.031;0.081]  |
| <b>RPP1a   cluster3</b> |                         |                         | 0.153<br>[0.122;0.187]  | 0.165<br>[0.110;0.214]  | 0.142<br>[0.108;0.177]  |
| <b>RPP2a   cluster4</b> |                         |                         |                         | 0.058<br>[0.033;0.082]  | 0.037<br>[0.022;0.052]  |
| <b>RPP2b   cluster5</b> |                         |                         |                         |                         | 0.047<br>[0.026;0.070]  |

| <b>RPPs<br/>(<math>q \geq 80\%</math>)</b> | <b>RPP2c   cluster2</b> | <b>RPP1a   cluster3</b> | <b>RPP2a   cluster4</b> | <b>RPP2b   cluster5</b> | <b>RPP2d   cluster6</b> |
|--------------------------------------------|-------------------------|-------------------------|-------------------------|-------------------------|-------------------------|
| <b>RPP1b   cluster1</b>                    | 0.099<br>[0.073;0.129]  | 0.198<br>[0.115;0.286]  | 0.101<br>[0.066;0.143]  | 0.156<br>[0.116;0.192]  | 0.122<br>[0.082;0.162]  |
| <b>RPP2c   cluster2</b>                    |                         | 0.158<br>[0.105;0.207]  | 0.096<br>[0.060;0.131]  | 0.117<br>[0.074;0.164]  | 0.097<br>[0.061;0.136]  |
| <b>RPP1a   cluster3</b>                    |                         |                         | 0.231<br>[0.18;0.286]   | 0.245<br>[0.163;0.316]  | 0.229<br>[0.177;0.282]  |
| <b>RPP2a   cluster4</b>                    |                         |                         |                         | 0.088<br>[0.050;0.123]  | 0.073<br>[0.048;0.095]  |
| <b>RPP2b   cluster5</b>                    |                         |                         |                         |                         | 0.079<br>[0.045;0.117]  |

# ESM\_8C CLASSIFICATION OF 1060 EUROPEAN CHESTNUT GENOTYPES. IN RECONSTRUCTED PANMICTIC POPULATIONS (RPPS) WHEN K=2 AND K=6 WITH SPANISH SAMPLES

K=2

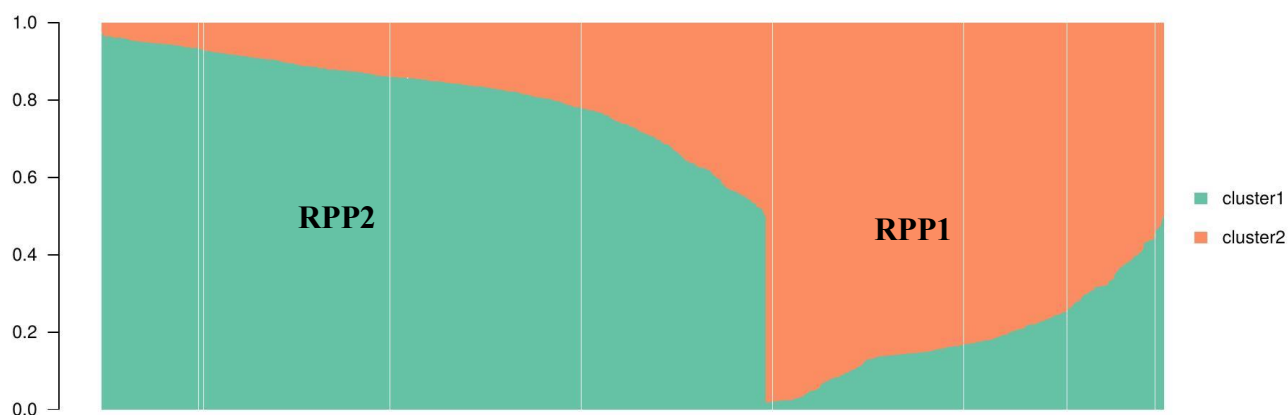

Table of assignments of sampling regions in reconstructed panmictic populations (RPPs) when K=2

| Sampling Regions | cluster1<br> RPP2 | cluster2<br>  RPP1 | Sum  | Admixed<br>(qI≤80%) |
|------------------|-------------------|--------------------|------|---------------------|
| CultArdech       | 6                 | 41                 | 47   | 20                  |
| CultAriege       | 42                | 22                 | 64   | 42                  |
| CultAveyron      | 51                | 19                 | 70   | 31                  |
| CultCorsica      | 1                 | 37                 | 38   | 14                  |
| CultHtPyr        | 30                | 12                 | 42   | 26                  |
| CultLimousin     | 59                |                    | 59   | 5                   |
| CultVar          | 1                 | 12                 | 13   | 1                   |
| CultSpain        | 3                 | 7                  | 10   | 5                   |
| ForArdech        | 39                | 47                 | 86   | 54                  |
| ForAveyron       | 134               | 6                  | 140  | 25                  |
| ForBasque        | 20                | 4                  | 24   | 15                  |
| ForCantal        | 22                |                    | 22   | 3                   |
| ForCorsica       | 1                 | 115                | 116  | 19                  |
| ForFinistere     | 230               | 18                 | 248  | 73                  |
| ForGard          | 10                | 20                 | 30   | 23                  |
| ForGironde       | 1                 | 4                  | 5    | 4                   |
| ForHerault       | 5                 | 11                 | 16   | 10                  |
| ForVar           |                   | 30                 | 30   |                     |
| Sum              | 655               | 405                | 1060 | 370                 |

Tables of pairwise Fst between RPPs using all individuals and strongly assigned individuals (qI ≥ 80%)

| RPPs | RPP1                  |
|------|-----------------------|
| RPP2 | 0.005 [0.029 ; 0.072] |

| RPPs strongly assigned | RPP1                  |
|------------------------|-----------------------|
| RPP2                   | 0.089 [0.054 ; 0.124] |

**Table of posterior probabilities of assignment of Spanish samples**

| Samples | Name       | Cluster1<br>  RPP2 | Cluster2<br>  RPP1 |
|---------|------------|--------------------|--------------------|
| ref001  | Luguesa    | 0.058              | <b>0.942</b>       |
| ref002  | Chamberga1 | 0.6703             | 0.3297             |
| ref003  | Negral     | 0.4955             | 0.5045             |
| ref004  | Pais       | 0.1407             | <b>0.8593</b>      |
| ref005  | Parede     | <b>0.8618</b>      | 0.1382             |
| ref006  | Porteliña  | 0.4929             | 0.5071             |
| ref007  | Puga       | 0.1974             | <b>0.8026</b>      |
| ref008  | Raigona1   | 0.1474             | <b>0.8526</b>      |
| ref009  | Rapada     | 0.2068             | 0.7932             |
| ref010  | Serodia    | 0.6479             | 0.3521             |

K=6

- In green. main genotypes are from many sampling regions (Cluster 1, RPP2c).
- In orange. main genotypes are from Var and Ardech (Cluster 2, RPP1a)
- In blue. main genotypes are from Aveyron (Cluster 3, RPP2b).
- In pink. main genotypes are from north west of France (Cluster 4, RPP2a).
- In clear green. genotypes from Corsica (Cluster 5, RPP1b)
- In yellow. main genotypes are from Pyrenees (Cluster 6, RPP2d)

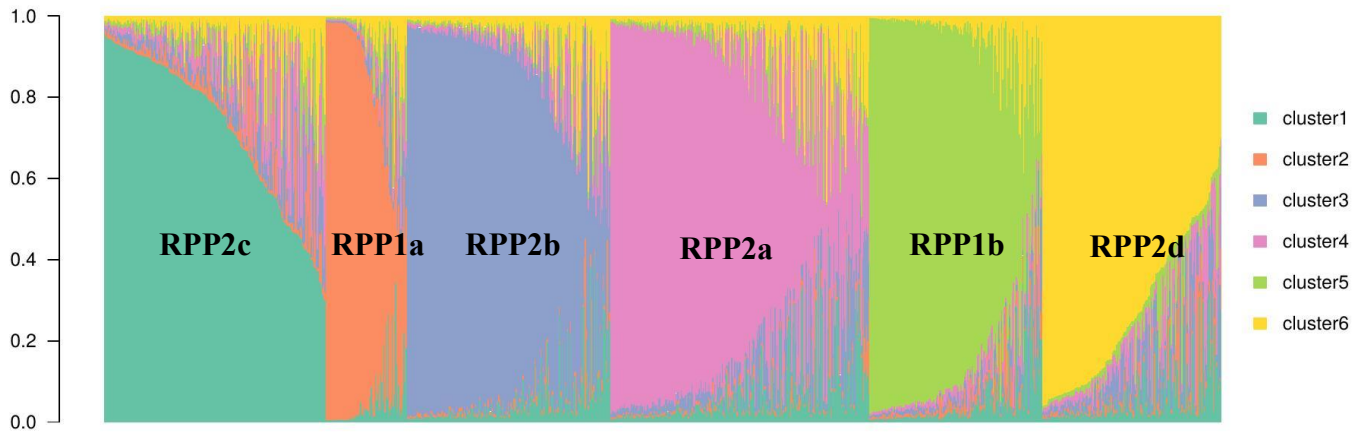

Table of assignement of sampling regions in reconstructed panmictic populations (RPPs)

| Sampling Regions | RPP2c   Cluster 1 | RPP1a   Cluster 2 | RPP2b   Cluster 3 | RPP2a   Cluster 4 | RPP1b   Cluster 5 | RPP2d   Cluster 6 | Sum  | Admixed (qI≤80%) |
|------------------|-------------------|-------------------|-------------------|-------------------|-------------------|-------------------|------|------------------|
| CultArdech       | 15                | 22                | 3                 | 1                 | 2                 | 4                 | 47   | 41               |
| CultAriege       | 4                 | 2                 | 6                 | 1                 | 3                 | 48                | 64   | 36               |
| CultAveyron      | 19                | 5                 | 21                | 18                |                   | 7                 | 70   | 49               |
| CultCorsica      | 1                 |                   |                   |                   | 34                | 3                 | 38   | 24               |
| CultHtPyr        | 3                 |                   | 1                 | 1                 |                   | 37                | 42   | 18               |
| CultLimousin     | 4                 |                   | 4                 | 42                |                   | 9                 | 59   | 27               |
| CultVar          |                   | 12                |                   | 1                 |                   |                   | 13   | 2                |
| CultSpain        | 1                 |                   |                   | 4                 | 2                 | 3                 | 10   | 9                |
| ForArdech        | 77                | 4                 | 1                 | 2                 | 2                 |                   | 86   | 33               |
| ForAveyron       | 11                |                   | 123               | 2                 |                   | 4                 | 140  | 43               |
| ForBasque        | 2                 |                   |                   | 1                 | 2                 | 19                | 24   | 12               |
| ForCantal        | 1                 |                   | 17                | 1                 |                   | 3                 | 22   | 11               |
| ForCorsica       | 4                 |                   | 1                 |                   | 110               | 1                 | 116  | 26               |
| ForFinistere     | 39                | 3                 | 13                | 168               | 6                 | 19                | 248  | 140              |
| ForGard          | 26                |                   | 3                 | 1                 |                   |                   | 30   | 11               |
| ForGironde       |                   |                   |                   | 1                 | 2                 | 2                 | 5    | 4                |
| ForHerault       | 2                 |                   |                   | 2                 | 1                 | 11                | 16   | 9                |
| ForVar           | 1                 | 29                |                   |                   |                   |                   | 30   | 4                |
| Sum              | 210               | 77                | 193               | 246               | 164               | 170               | 1060 | 499              |

Tables of pairwise Fst between RPPs using all individuals and strongly assigned individuals (ql ≥ 80%)

| RPPs     | cluster2               | cluster3               | cluster4               | cluster5               | cluster6               |
|----------|------------------------|------------------------|------------------------|------------------------|------------------------|
| cluster1 | 0.103<br>[0.072;0.135] | 0.075<br>[0.049;0.104] | 0.060<br>[0.036;0.085] | 0.061<br>[0.045;0.079] | 0.050[0.030;0.076]     |
| cluster2 |                        | 0.166<br>[0.110;0.214] | 0.153<br>[0.121;0.185] | 0.123 [0.072;0.19]     | 0.140<br>[0.105;0.172] |
| cluster3 |                        |                        | 0.059<br>[0.035;0.085] | 0.107 [0.082;0.13]     | 0.048<br>[0.027;0.072] |
| cluster4 |                        |                        |                        | 0.077<br>[0.048;0.112] | 0.037<br>[0.023;0.053] |
| cluster5 |                        |                        |                        |                        | 0.071<br>[0.046;0.096] |

| RPPs<br>(ql ≥ 80%) | cluster2               | cluster3               | cluster4               | cluster5               | cluster6               |
|--------------------|------------------------|------------------------|------------------------|------------------------|------------------------|
| cluster1           | 0.157<br>[0.104;0.207] | 0.118<br>[0.076;0.162] | 0.097 [0.06;0.135]     | 0.100<br>[0.075;0.128] | 0.096<br>[0.063;0.135] |
| cluster2           |                        | 0.245<br>[0.163;0.316] | 0.232<br>[0.181;0.286] | 0.199<br>[0.119;0.287] | 0.231<br>[0.181;0.281] |
| cluster3           |                        |                        | 0.088<br>[0.053;0.123] | 0.157<br>[0.116;0.194] | 0.082<br>[0.045;0.120] |
| cluster4           |                        |                        |                        | 0.101<br>[0.066;0.143] | 0.071<br>[0.047;0.093] |
| cluster5           |                        |                        |                        |                        | 0.121<br>[0.080;0.161] |

Table of posterior probabilities of assignment of Spanish samples

| Samples | Name       | Cluster1 | Cluster2 | Cluster3 | Cluster4 | Cluster5 | Cluster6      |
|---------|------------|----------|----------|----------|----------|----------|---------------|
| ref001  | Luguesa    | 0.3809   | 0.2989   | 0.007    | 0.007    | 0.275    | 0.0312        |
| ref002  | Chamberga1 | 0.0223   | 0.0052   | 0.0101   | 0.0414   | 0.036    | <b>0.8849</b> |
| ref003  | Negral     | 0.0216   | 0.0103   | 0.0192   | 0.4945   | 0.4108   | 0.0436        |
| ref004  | Pais       | 0.0289   | 0.0525   | 0.0137   | 0.0334   | 0.7942   | 0.0773        |
| ref005  | Paredes    | 0.0161   | 0.0149   | 0.0769   | 0.7942   | 0.0648   | 0.0332        |
| ref006  | Porteliña  | 0.0367   | 0.0101   | 0.0088   | 0.5012   | 0.1989   | 0.2442        |
| ref007  | Puga       | 0.0093   | 0.0617   | 0.01     | 0.0267   | 0.2627   | 0.6296        |
| ref008  | Raigonal   | 0.0213   | 0.314    | 0.0083   | 0.0317   | 0.1454   | 0.4792        |
| ref009  | Rapada     | 0.0353   | 0.049    | 0.048    | 0.0543   | 0.5119   | 0.3014        |
| ref010  | Serodia    | 0.0132   | 0.0062   | 0.0131   | 0.6748   | 0.2157   | 0.077         |
