# Supplementary material for: Two main genetic clusters with high admixture between forest and cultivated chestnut (Castanea sativa Mill.) in France
Source: Springer Nature journal article supplement (doi:10.1007/s13595-020-00982-w), 2020-07-28
Supplement: MOESM9 [file 13595_2020_982_MOESM9_ESM.pdf]

TWO MAIN GENETIC CLUSTERS WITH HIGH ADMIXTURE BETWEEN FOREST AND CULTIVATED  
CHESTNUT (*CASTANEA SATIVA* MILL.) IN FRANCE

ESM\_9

**Within-cluster genetic variability at 10 loci without MLGs, on strongly assigned individuals ( $q \geq 80\%$ )**

N: number of unique individuals genotyped per cluster; Na: number of alleles; Ne: mean number of effective alleles; Ho: observed heterozygosity; He: expected heterozygosity; Fis: inbreeding coefficient with 95% confidence interval. The “total” row contains the sum of N, the total number of alleles (Na), and the mean for the other indices.

| RPPs<br>( $q \geq 80\%$ ) | N   | Ne   | Na  | Ho    | He    | Fis                   |
|---------------------------|-----|------|-----|-------|-------|-----------------------|
| RPP1a  <br>Cluster 3      | 42  | 2.23 | 46  | 0.592 | 0.545 | -0.081 [-0.245;0.18]  |
| RPP2a  <br>Cluster 4      | 127 | 3.49 | 72  | 0.733 | 0.711 | -0.029 [-0.06;0.011]  |
| RPP2b  <br>Cluster 5      | 119 | 2.6  | 53  | 0.627 | 0.613 | -0.016 [-0.042;0.007] |
| RPP2d  <br>Cluster 6      | 74  | 3.18 | 66  | 0.625 | 0.681 | 0.088 [0.026;0.153]   |
| RPP2c  <br>Cluster 2      | 96  | 3.11 | 63  | 0.676 | 0.675 | 0.003 [-0.03;0.032]   |
| RPP1b  <br>Cluster 1      | 106 | 3.39 | 70  | 0.686 | 0.702 | 0.024 [-0.067;0.141]  |
| <b>Total</b>              | 564 | 3.96 | 112 | 0.657 | 0.654 | -0.002                |
